# Supplementary material for: Highly emissive dinuclear europium( iii ) complex with heteroaryl β-diketone and fluxidentate pyrazine: dual role as UV converters and semiconductors
Source: Royal Society of Chemistry journal article supplement (doi:10.1039/d5ra06968h), 2025-01-01
Supplement: d5ra06968h1.pdf [file d5ra06968h1.pdf]

=

## Highly Emissive Dinuclear Europium(III) Complex with Heteroaryl $\beta$ -Diketone and Fluxidentate Pyrazine: Dual Role as UV Converters and Semiconductors

Vandana Aggarwal<sup>a</sup>, Devender Singh<sup>a, b\*</sup>, Sofia Malik<sup>a</sup>, Shri Bhagwan<sup>a</sup>, Sumit Kumar<sup>c</sup>, Rajender Singh Malik<sup>c</sup>, Parvin Kumar<sup>d</sup> and Jayant Sindhu<sup>e</sup>

<sup>a</sup>Department of Chemistry, Maharshi Dayanand University, Rohtak-124001, Haryana, India

<sup>b</sup> Department of Chemistry, Lovely Professional University, Phagwara, Jalandhar, 14441, Punjab, India

<sup>c</sup>Department of Chemistry, DCR University of Science & Technology, Murthal -131039 Haryana, India.

<sup>d</sup>Department of Chemistry, Kurukshetra University Kurukshetra -136119, Haryana, India.

<sup>e</sup>Department of Chemistry, COBS&H, CCS Haryana Agricultural University, Hisar-125004, Haryana, India.

### SUPPLEMENTARY INFORMATION

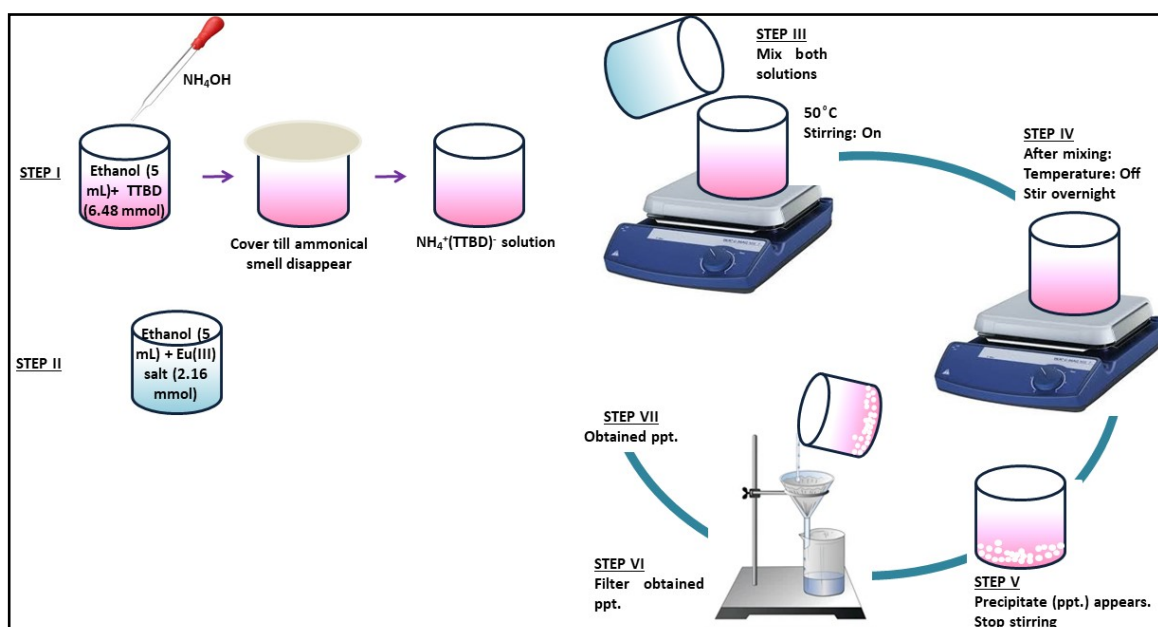

**Fig. S1** Synthetic route followed for preparing EuA

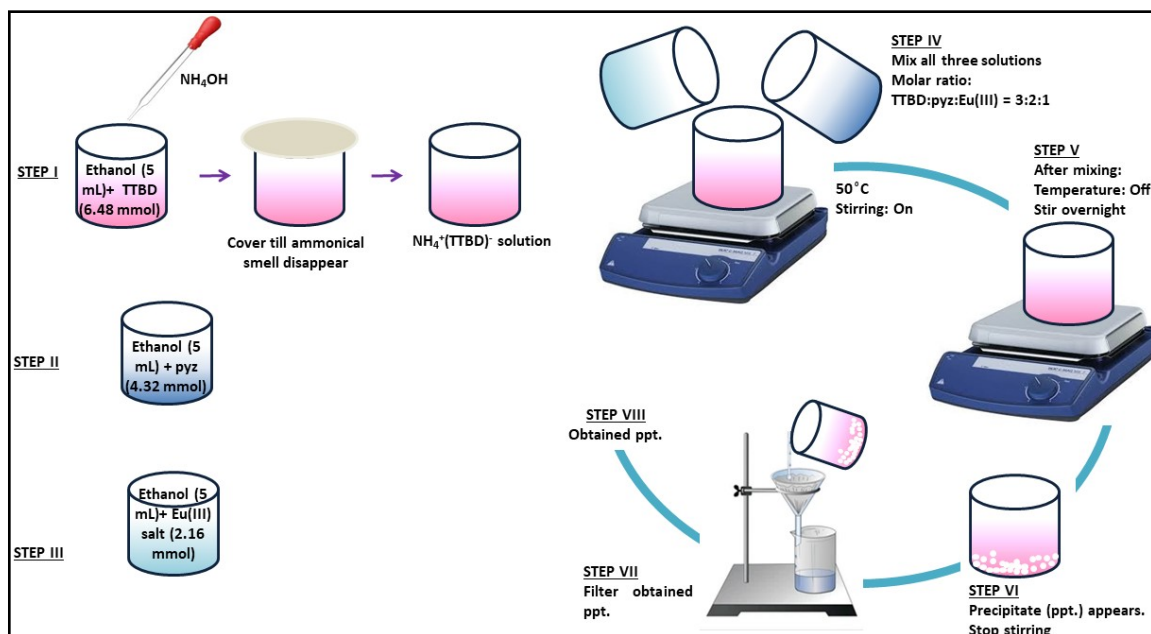

**Fig. S2** Synthetic route followed for preparing EuM

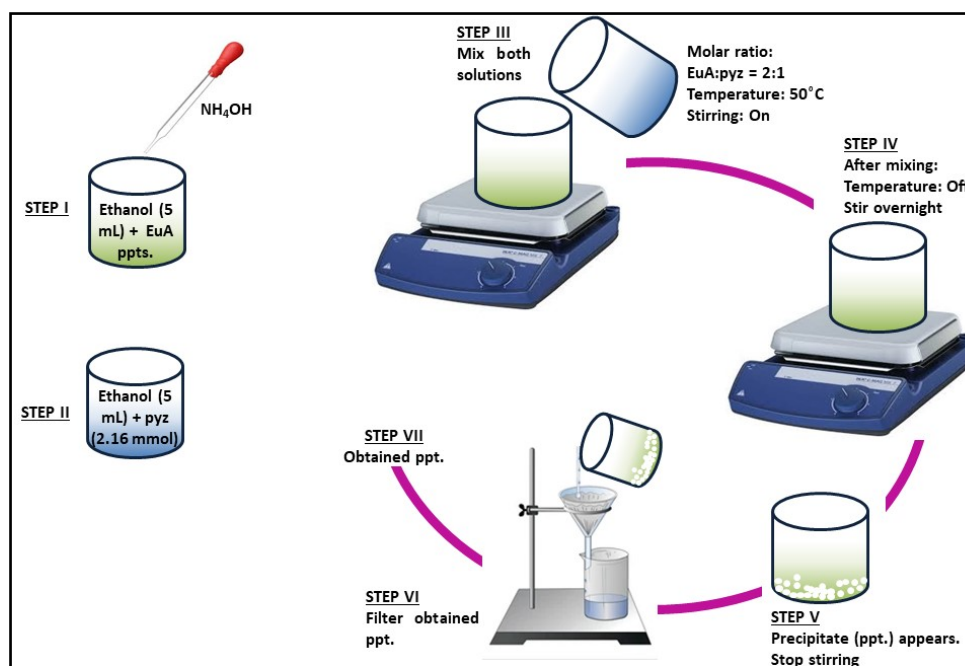

**Fig. S3** Synthetic route followed for preparing EuD

The phosphorescence spectra of  $[\text{Gd}(\text{TTBD})_3]$  and  $[\text{Gd}(\text{pyz})_3]$  complexes at 77 K (Fig. S4 and Fig. S5, respectively) contain bands at  $\lambda_{\text{max}} = 501$  and 467 nm, respectively. This band is not

=

observed on the emission spectrum of  $\text{Eu}(\text{TTBD})_3 \cdot 2\text{H}_2\text{O}$  indicating the energy transfer from both (TTBD and pyz) ligands to the  $\text{Eu}(\text{III})$  ion is considerably efficient.

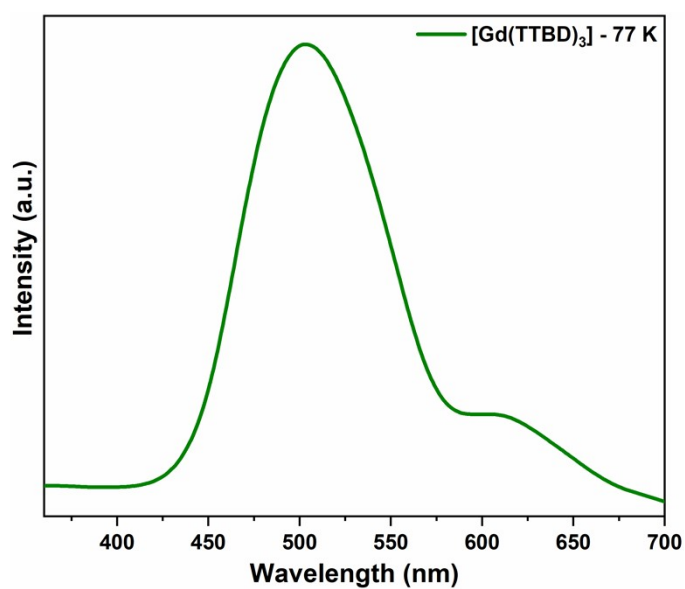

**Fig. S4** Phosphorescence measurements at 77K of  $[\text{Gd}(\text{TTBD})_3]$  complex

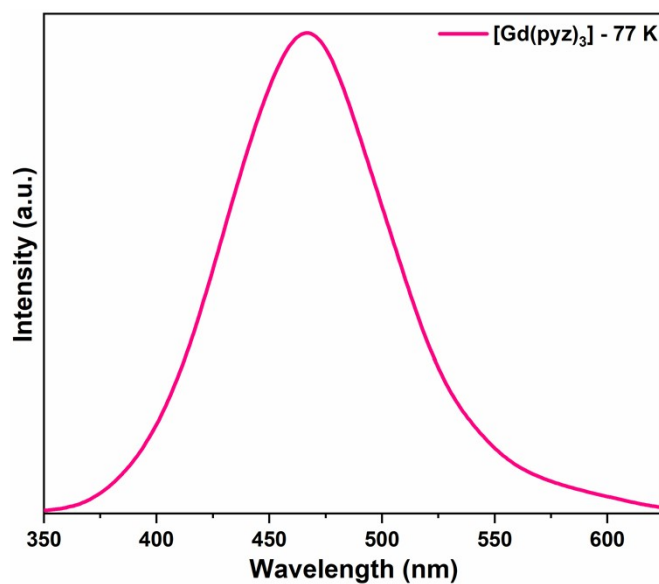

**Fig. S5** Phosphorescence measurements at 77K of  $[\text{Gd}(\text{pyz})_3]$  complex

=

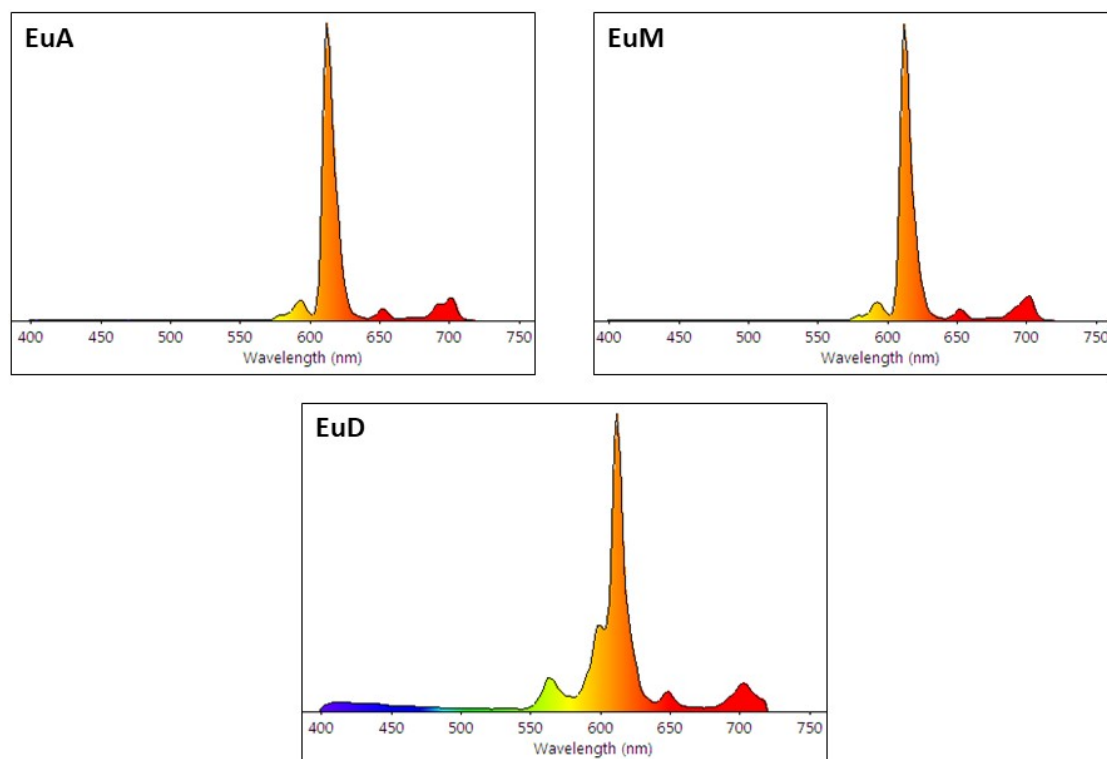

**Fig. S6** Color contribution of each peak in formed complexes

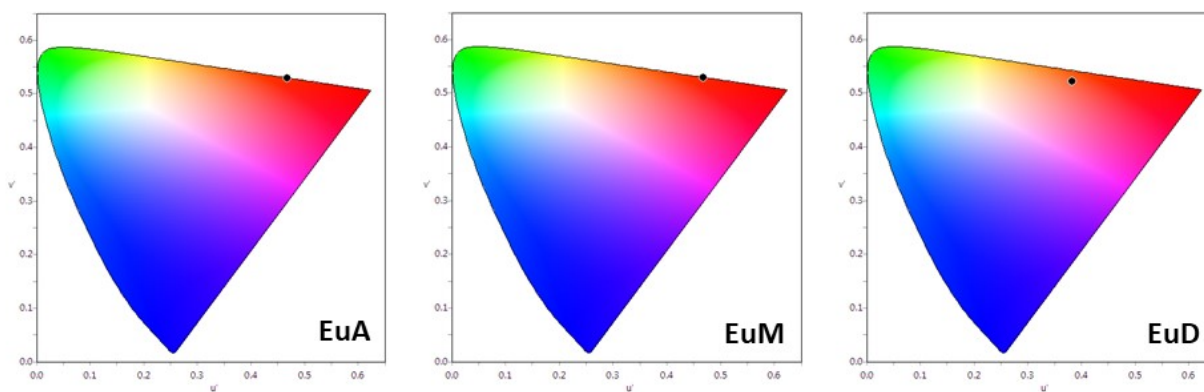

**Fig. S7** (u', v') coordinates of EuA-EuD in solution form

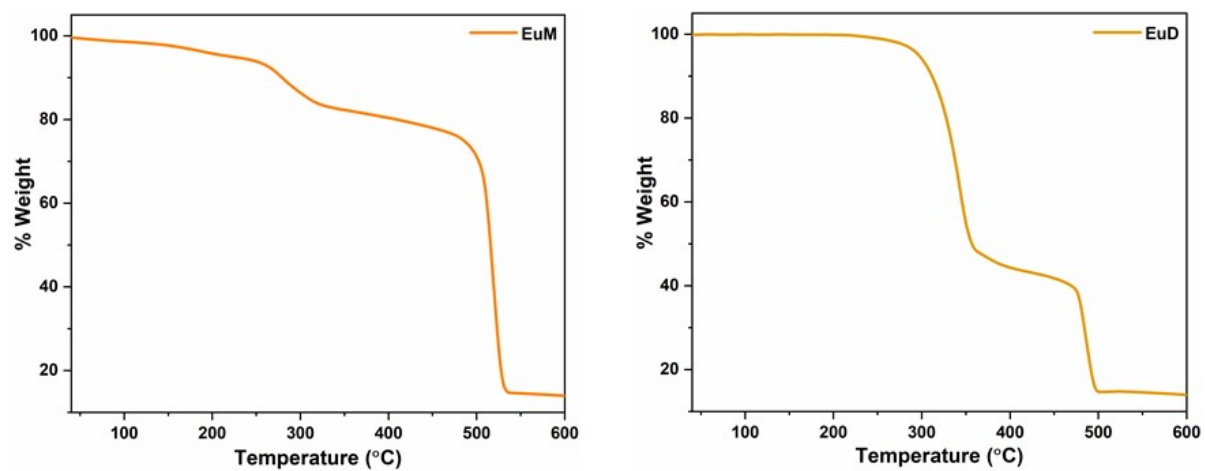

**Fig. S8** TGA curves of EuM and EuD
